# Supplementary material for: Polymeric ionic conductor networks enable stable cycling of high-voltage lithium metal batteries using solid-state poly-ether electrolytes
Source: Royal Society of Chemistry journal article supplement (doi:10.1039/d4ta05468g), 2024-01-01
Supplement: d4ta05468g1.pdf [file d4ta05468g1.pdf]

## *Supplementary Data*

### **Polymeric ionic conductor networks enable stable cycling of high-voltage lithium metal batteries using solid-state poly-ether electrolytes**

*Shanshan Yang, Tao Meng, Zhangci Wang and Xianluo Hu\**

State Key Laboratory of Materials Processing and Die & Mould Technology, School of Materials Science and Engineering, Huazhong University of Science and Technology, Wuhan 430074, China

E-mail: [huxl@mail.hust.edu.cn](mailto:huxl@mail.hust.edu.cn) (X. L. Hu)

**Table S1.** Summary of parameters and chemical performance of the cathodes including the cells in this work and in previous reports.

| <b>Battery Engineering</b>               | <b>Cathode  Li</b>                                               | <b>Electrolyte Composition</b>                                    | <b>LSV</b> | <b>Performance</b><br>Cycle number–<br>Retention<br>Rate                                                                                                                      | <b>Ref.</b> |
|------------------------------------------|------------------------------------------------------------------|-------------------------------------------------------------------|------------|-------------------------------------------------------------------------------------------------------------------------------------------------------------------------------|-------------|
| <b>YSZ filler</b>                        | NCM622  Li<br>2.8–4.3 V<br>2.8–4.6 V                             | LiTFSI+LiPF <sub>6</sub> __DOL+YSZ<br>(YSZ CSE)                   | 5.6 V      | 800 <sup>th</sup> –74% (0.5C)<br>60 <sup>th</sup> –90% (0.5C)                                                                                                                 | 1           |
| <b>Solvent reconstruction</b>            | NCM622  Li<br>3.0–4.6 V                                          | LiFSI__DOL+LiTFSI+TTE<br>(Hybrid-DOL/PDOL-TTE)                    | 4.7 V      | 100 <sup>th</sup> –88.1%<br>(0.12C)                                                                                                                                           | 2           |
| <b>Dual–interface CEI/SEI</b>            | NCM811  Li<br>2.8–4.3 V<br>NCM622  Li<br>2.8–4.3/4.5 V,<br>45 °C | LiPF <sub>6</sub> +LiTFSI+LiDFOB+LiBF <sub>4</sub> __DOL          | 4.6 V      | 120 <sup>th</sup> –83.1%<br>(0.2C)<br>200 <sup>th</sup> –82.8%<br>(0.2C–4.3 V)<br>120 <sup>th</sup> –86.4%<br>(0.2C–4.5 V)<br>100 <sup>th</sup> –86.7%<br>(0.2C–4.5 V, 45 °C) | 3           |
| <b>In situ gelation</b>                  | NCM622  Li<br>2.8–4.3 V                                          | LiTFSI+LiPF <sub>6</sub> __DME/DOL                                | 4.6 V      | 100 <sup>th</sup> –90.1%<br>(0.1C)                                                                                                                                            | 4           |
| <b>TB additives</b>                      | NCM622  Li<br>3.0–4.3 V                                          | LiTFSI__DOL+TFB<br>(TB–PDE)                                       | 4.8 V      | 200 <sup>th</sup> –80% (0.5C)                                                                                                                                                 | 5           |
| <b>Crosslinked polymer</b>               | NCM811  Li<br>2.8–4.3 V                                          | LiTFSI__DOL/TTMAP+TFB<br>(PTADOL)                                 | 4.6 V      | 150 <sup>th</sup> –81.4%<br>(0.5C)                                                                                                                                            | 6           |
| <b>LiDFOB additives</b>                  | NCM622  Li<br>2.8–4.3 V                                          | LiPF <sub>6</sub> __EC/DEC/DMC/DOL+LiDFOB<br>(ACPN)               | –          | CE~99.5% (0.2C)<br>200 <sup>th</sup> –86% (0.5C)<br>120 <sup>th</sup> –88.5% (1C)                                                                                             | 7           |
| <b>Substrate assisted</b>                | NCM622  Li<br>2.8–4.3 V                                          | LiTFSI+LiPF <sub>6</sub> __DOL                                    | 5.0 V      | 300 <sup>th</sup> –<br>85%+(0.5C)                                                                                                                                             | 8           |
| <b>LiPF<sub>6</sub>–coated separator</b> | NCM811  Li<br>2.8–4.2/4.3 V                                      | LiTFSI__DME/DOL+LiPF <sub>6</sub> coated separator<br>(BSPE)      | 4.4 V      | 55 <sup>th</sup> –99.8% (0.3C)<br>55 <sup>th</sup> –81.3% (0.3C)                                                                                                              | 9           |
| <b>Nano–hierarchical</b>                 | LCO  Li<br>3.0–4.25 V<br>NCM811  Li<br>3.0–4.25 V                | LiTFSI__DOL+AlI <sub>3</sub> +LiPF <sub>6</sub> +LiDFOB<br>(SPEE) | 5.7 V      | 200 <sup>th</sup> –91.7%<br>(0.5C)<br><br>CEs>99% (0.2C)                                                                                                                      | 10          |

|                                             |                                         |                                                 |       |                                                                                                                         |              |
|---------------------------------------------|-----------------------------------------|-------------------------------------------------|-------|-------------------------------------------------------------------------------------------------------------------------|--------------|
| <b>Copolymer</b>                            | LCO  Li<br>4.2 V                        | LiTFSI/LiDFOB__DOL/TXE/SN<br>(SN-CPE)           | 5.1 V | 50 <sup>th</sup> -86.4% (0.2C)<br>~99%                                                                                  | 11           |
| <b>Hybrid solid/liquid electrolyte</b>      | (TPP mixed-)<br>NCM622  Li<br>2.8-4.2 V | LiPF <sub>6</sub> _DOL/EC/DEC/DMC<br>(HSLE)     | 4.6 V | 100 <sup>th</sup> -93% (0.5C)                                                                                           | 12           |
| <b>Al(OTf)<sub>3</sub> additives</b>        | NCM622  Li<br>3.0-4.2 V                 | LiTFSI__DOL+Al(OTf) <sub>3</sub>                | -     | 5 <sup>th</sup> -96.5% (0.2C)                                                                                           | 13           |
| <b>Crosslinked network</b>                  | NCM811  Li<br>2.8-4.2 V                 | LiTFSI__DOL/TMSO+TFB<br>(PSiDOL)                | 5.1 V | 100 <sup>th</sup> -90%<br>(0.3C)                                                                                        | 14           |
| <b>Dual-function additive</b>               | LCO  Li<br>3.0-4.2 V                    | LiTFSI__DOL+Sn(OTf) <sub>2</sub><br>(PDOL GPE ) | 4.4 V | 100 <sup>th</sup> : no obvious<br>fade                                                                                  | 15           |
| <b>High stable ionic conductor network"</b> | LCO  Li<br>3.0-4.6 V<br>3.0-4.5 V       | LiTFSI+LiPF <sub>6</sub> _DME/DOL               | 5 V+  | 100 <sup>th</sup> / 300 <sup>th</sup> -<br>80.62% / 66.93%<br>(0.5C-4.6 V)<br>600 <sup>th</sup> -79.83%<br>(0.5C-4.5 V) | This<br>work |

**Notes: Full name of additives for the Abbreviation in Table S1:**

TFB: tris(pentafluorophenyl)borane

TPP: triphenylphosphine

TTMAP: trimethylolpropane tris[3-(2-methyl-1-aziridine) propionate]

TXE: 1,3,5-trioxane(trioxymethylene)

SN: succinonitrile

YSZ: yttrium stabilized zirconia

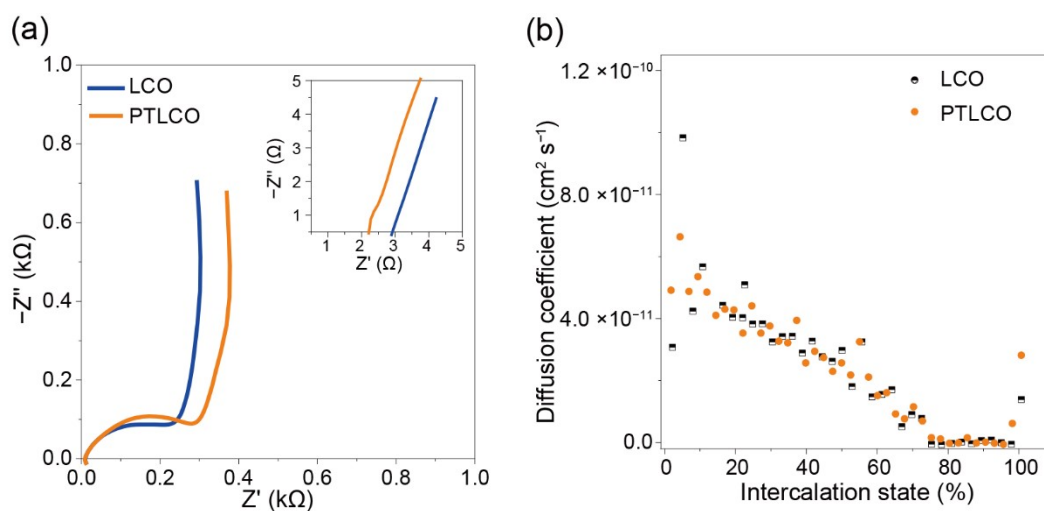

**Fig. S1.** Electrochemical properties. (a) EIS spectra of LCO||Li with different electrolytes. (b) Li<sup>+</sup> diffusion coefficient in the cathode during discharging from GITT versus intercalation state.

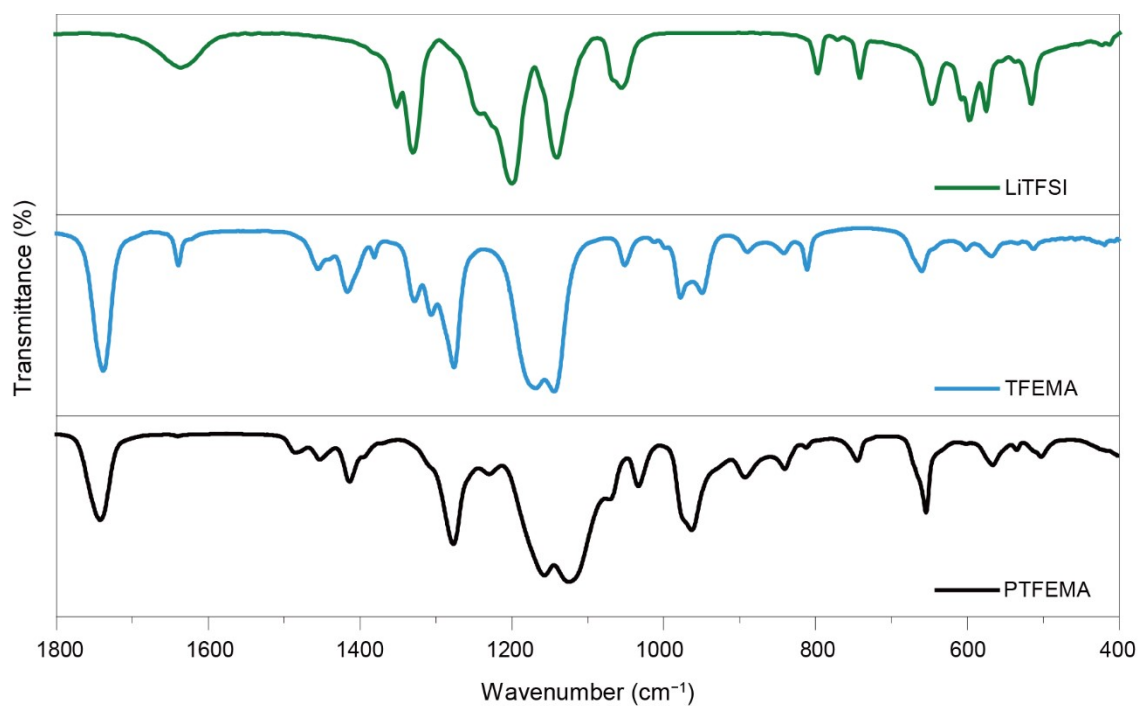

**Fig. S2.** FTIR spectra of LiTFSI, TFEMA, and PTFEMA.

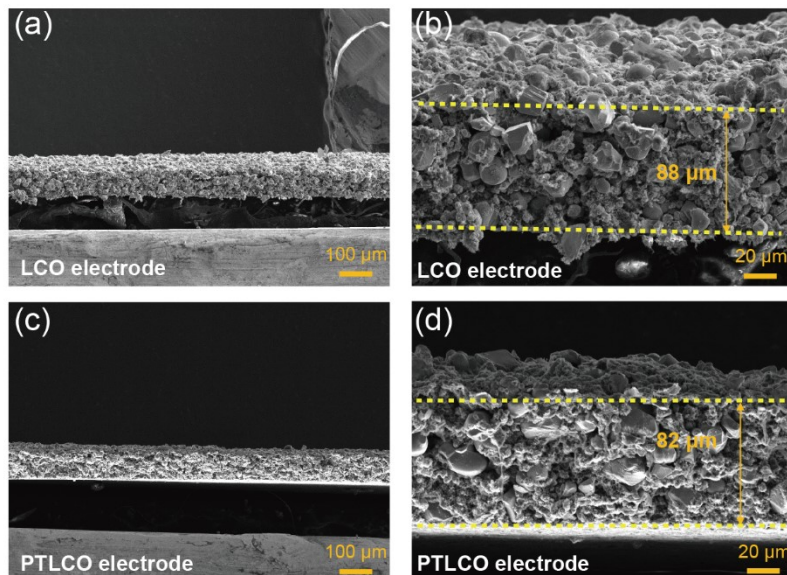

**Fig. S3.** Cross-sectional SEM images of the (a,b) LCO electrode and (c,d) PTLCO electrode without the Al current collector.

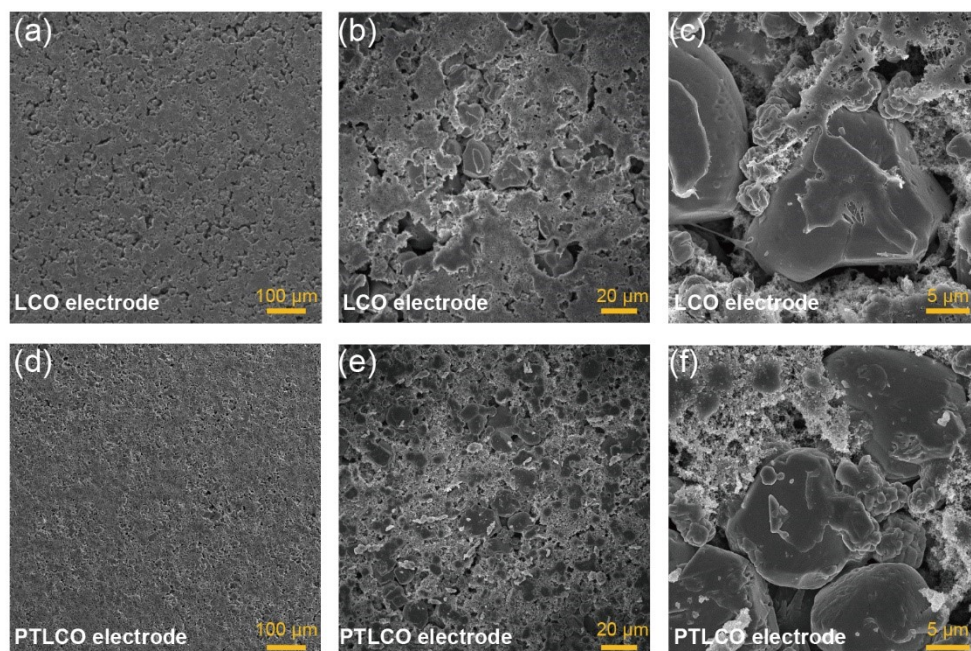

**Fig. S4.** SEM images from the bottom side of the (a–c) bare LCO electrode and (d–f) PTLCO electrode without the Al current collector.

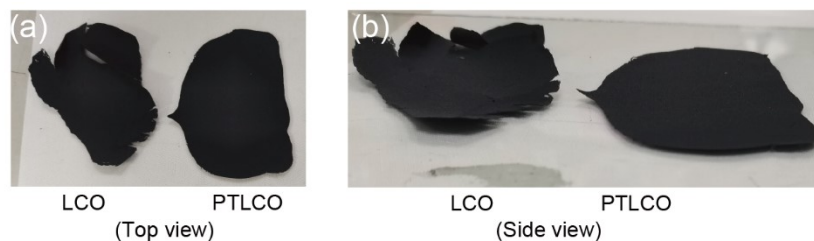

**Fig. S5.** Digital photos of the electrode removed from glass plate from (a) top view and (b) side view.

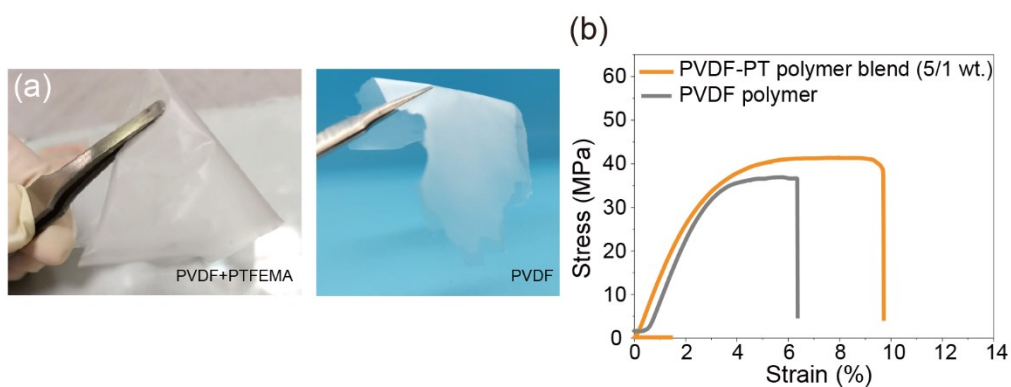

**Fig. S6.** Mechanical properties of the PVDF and PVDF-PT products. (a) Digital photos of polymer membranes. (b) Tensile stress-strain curves.

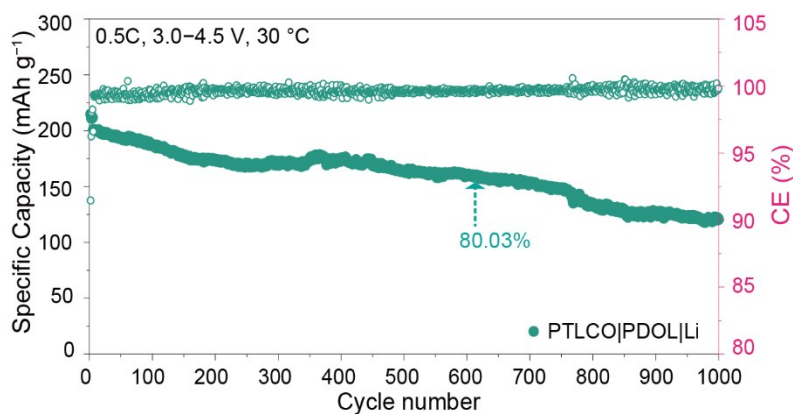

**Fig. S7.** Long-term cycling performance at 0.5C with a voltage range of 3.0 to 4.5 V.

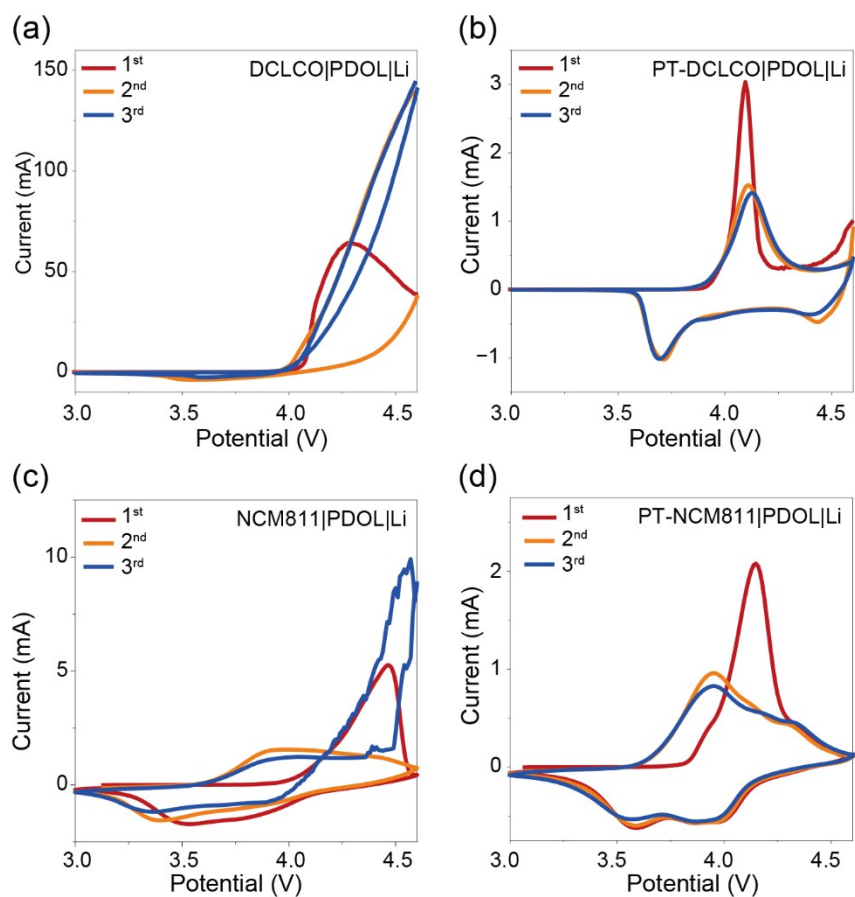

**Fig. S8.** CV curves for half-cell with PDOL electrolyte at the scan rate of  $0.3 \text{ mV s}^{-1}$ , with a voltage range of 2.8 to 4.6 V: a) polycrystalline LCO, b) modified polycrystalline LCO, c) NCM811, d) modified NCM811.

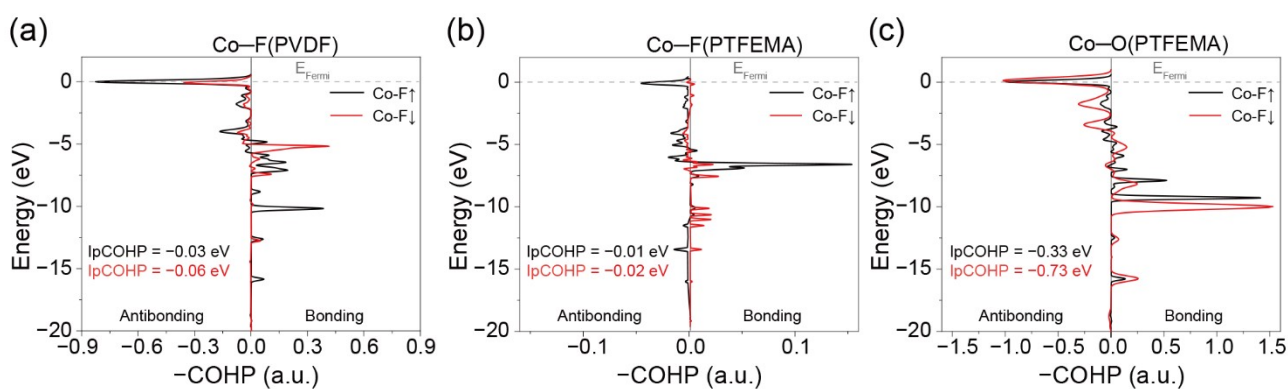

**Fig. S9.** Corresponding COHP. COHP Between Co  $d$  orbitals and (a) F(PVDF), (b) F(PTFEMA), (c) O(PTFEMA).

## References:

- 1 H. Yang, B. Zhang, M. Jing, X. Shen, L. Wang, H. Xu, X. Yan, X. He, *Adv. Energy Mater.*, 2022, **12**, 2201762.
- 2 X. Peng, T. Wang, B. Liu, Y. Li, T. Zhao, *Energy Environ. Sci.*, 2022, **15**, 5350.
- 3 J.-Y. Liang, X.-D. Zhang, Y. Zhang, L.-B. Huang, M. Yan, Z.-Z. Shen, R. Wen, J. Tang, F. Wang, J.-L. Shi, L.-J. Wan, Y.-G. Guo, *J. Am. Chem. Soc.*, 2021, **143**, 16768.
- 4 F.Q. Liu, W.P. Wang, Y.X. Yin, S.F. Zhang, J.L. Shi, L. Wang, X.D. Zhang, Y. Zheng, J.J. Zhou, L. Li, Y.G. Guo, *Sci. Adv.*, 2018, **4**, 5383.
- 5 J. Xiang, Y. Zhang, B. Zhang, L. Yuan, X. Liu, Z. Cheng, Y. Yang, X. Zhang, Z. Li, Y. Shen, J. Jiang, Y. Huang, *Energy Environ. Sci.*, 2021, **14**, 3510.
- 6 Y. Du, L. Zhao, C. Xiong, Z. Sun, S. Liu, C. Li, S. Hao, W. Zhou, H. Li, *Energy Storage Mater.*, 2023, **56**, 310.
- 7 J.Y. Liang, X.D. Zhang, X.X. Zeng, M. Yan, Y.X. Yin, S. Xin, W.P. Wang, X.W. Wu, J.L. Shi, L.J. Wan, Y.G. Guo, *Angew. Chem. Int. Ed.*, 2020, **59**, 6585.
- 8 H. Yang, M.-X. Jing, H.-P. Li, W.-Y. Yuan, B. Deng, Q.-Y. Liu, B.-W. Ju, X.-Y. Zhang, S. Hussain, X.-Q. Shen, X.-H. Yan, *Chem. Eng. J.*, 2021, **421**, 129710.
- 9 Y. Chen, F. Huo, S. Chen, W. Cai, S. Zhang, *Adv. Funct. Mater.*, 2021, **31**, 2102347.
- 10 Z. Wen, Z. Zhao, L. Li, Z. Sun, N. Chen, Y. Li, F. Wu, R. Chen, *Adv. Funct. Mater.*, 2021, **32**, 202109184.
- 11 Z. Ren, J. Li, M. Cai, R. Yin, J. Liang, Q. Zhang, C. He, X. Jiang, X. Ren, *J. Mater. Chem. A*, 2023, **11**, 1966.
- 12 Q. Ma, J. Yue, M. Fan, S.J. Tan, J. Zhang, W.P. Wang, Y. Liu, Y.F. Tian, Q. Xu, Y.X. Yin, Y. You, A. Luo, S. Xin, X.W. Wu, Y.G. Guo, *Angew. Chem. Int. Ed.*, 2021, **60**, 16554.
- 13 Q. Zhao, X. Liu, S. Stalin, K. Khan, L.A. Archer, *Nat. Energy*, 2019, **4**, 365.
- 14 J. Cui, Y. Du, L. Zhao, X. Li, Z. Sun, D. Li, H. Li, *Chem. Eng. J.*, 2023, **461**, 141973.
- 15 J. Zheng, W. Zhang, C. Huang, Z. Shen, X. Wang, J. Guo, S. Li, S. Mao, Y. Lu, *Mater. Today Energy*, 2022, **26**, 100984.
